# Supplementary material for: Facile one-pot synthesis of novel water-soluble fluorescent hyperbranched poly(amino esters)
Source: Royal Society of Chemistry journal article supplement (doi:10.1039/c6ra19062f), 2016-01-01
Supplement: c6ra19062f1.pdf [file c6ra19062f1.pdf]

**Supporting information**

**Facile One-pot Synthesis of Novel Water-soluble Fluorescent  
Hyperbranched Poly(amino ester)**

Yuqun Du, Hongxia Yan\*, Song Niu, Lihua Bai, Fu Chai

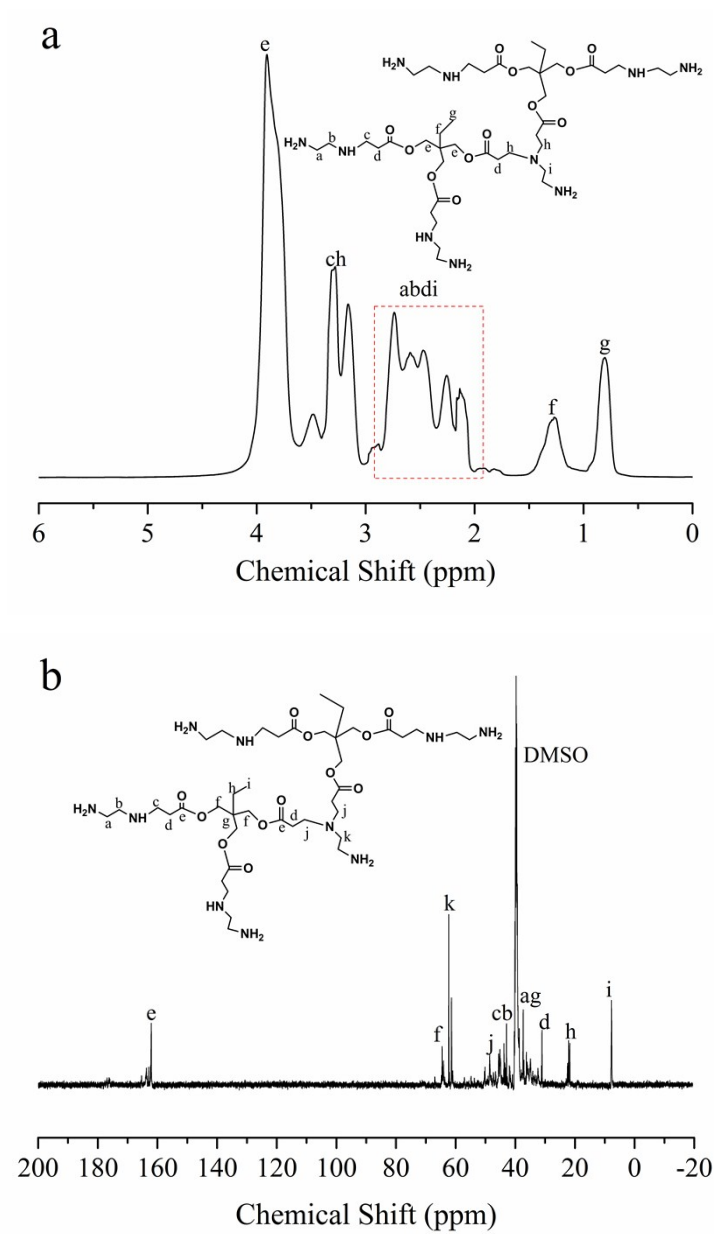

Fig. S1 (a)  $^1\text{H}$  and (b)  $^{13}\text{C}$  NMR spectrum of P2.

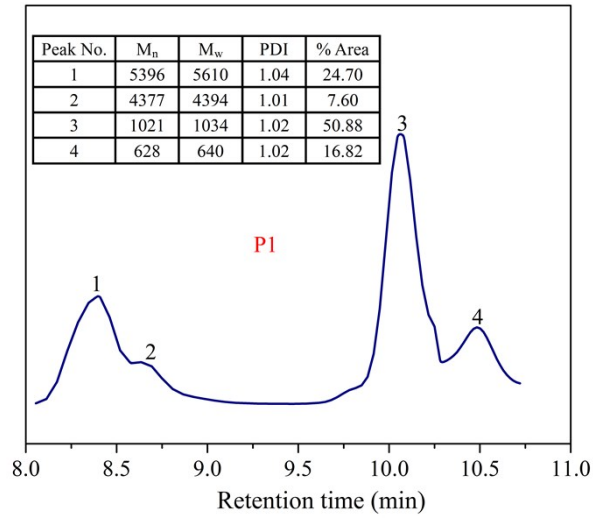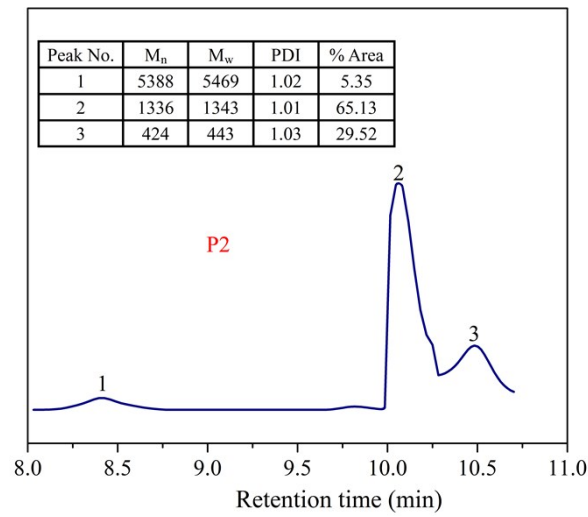

Fig. S2 GPC of P1 and P2

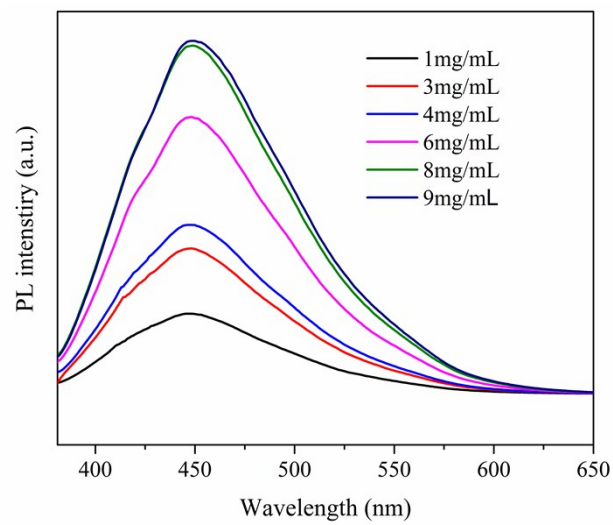

Fig. S3 Fluorescence spectra of P2 solutions at different concentrations.

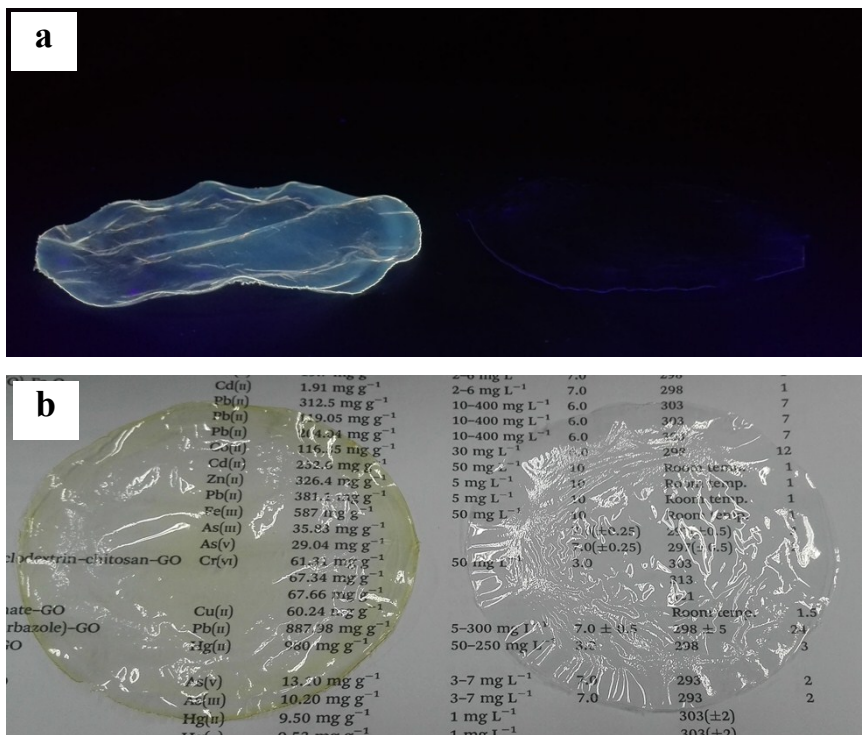

Fig. S4 PVA films with addition of P2 (left), and pure PVA (right) under UV light (a), natural light (b).
